# Supplementary material
Source: publisher site journal article supplement (https://www.dovepress.com/article/189048)
Supplement: Supplementary file 1 [file get_supplementary_file.php]

# Supplementary Materials

## I. Supplementary Figures

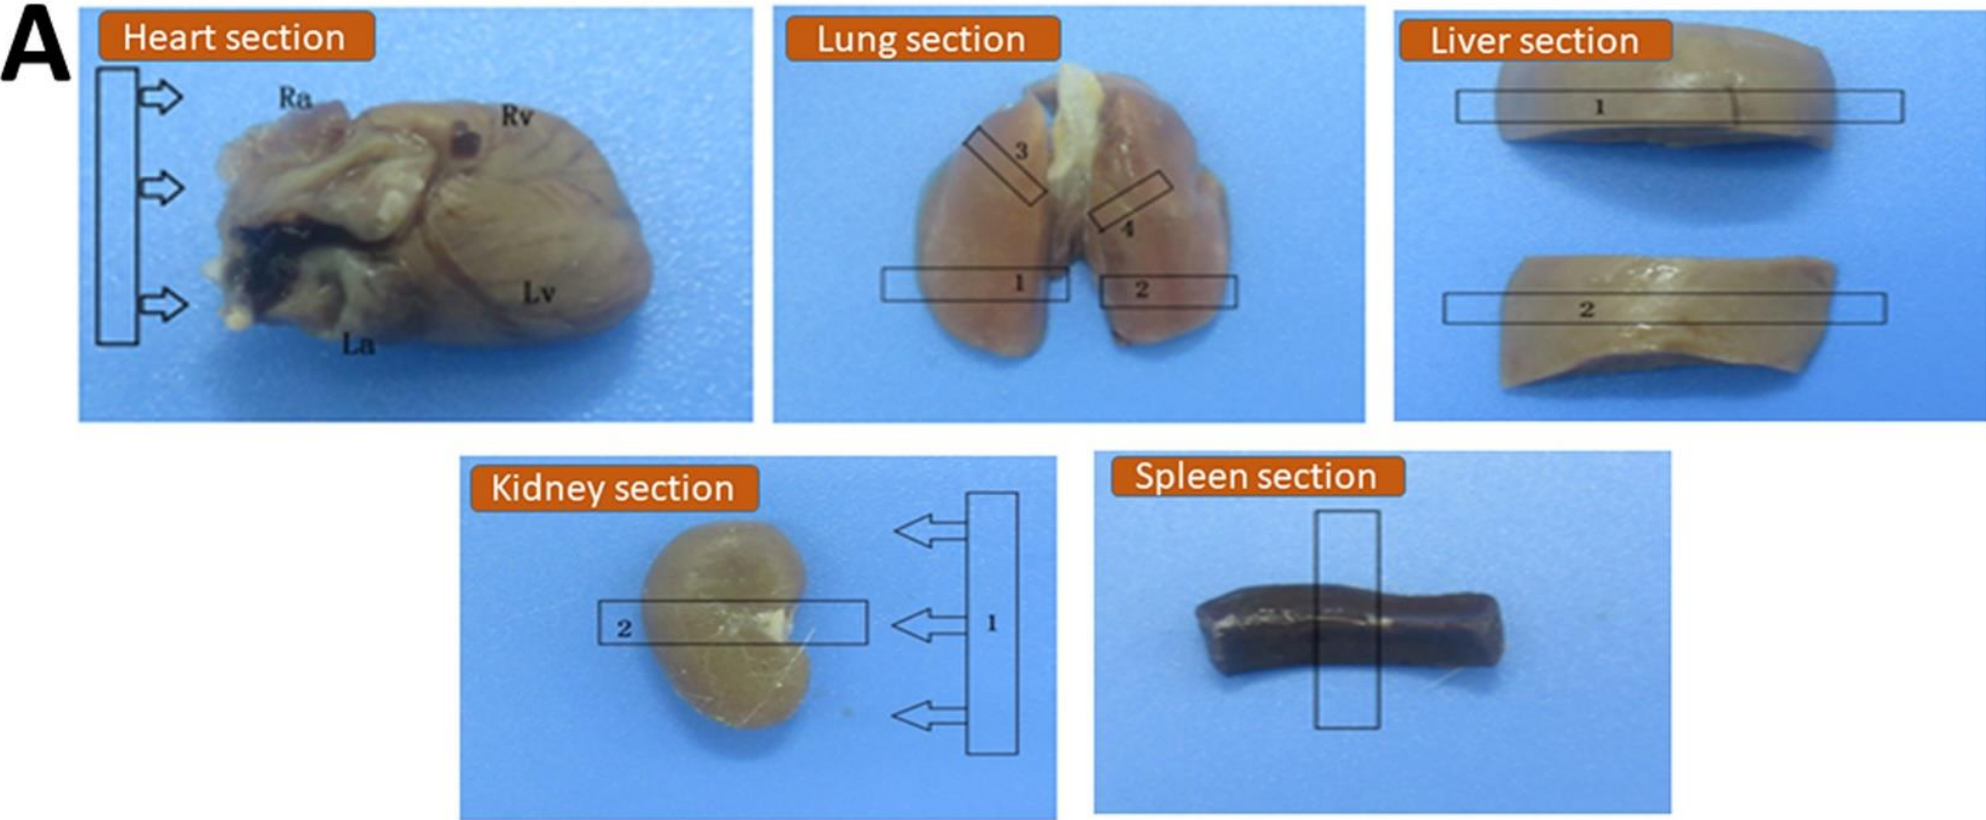

**B**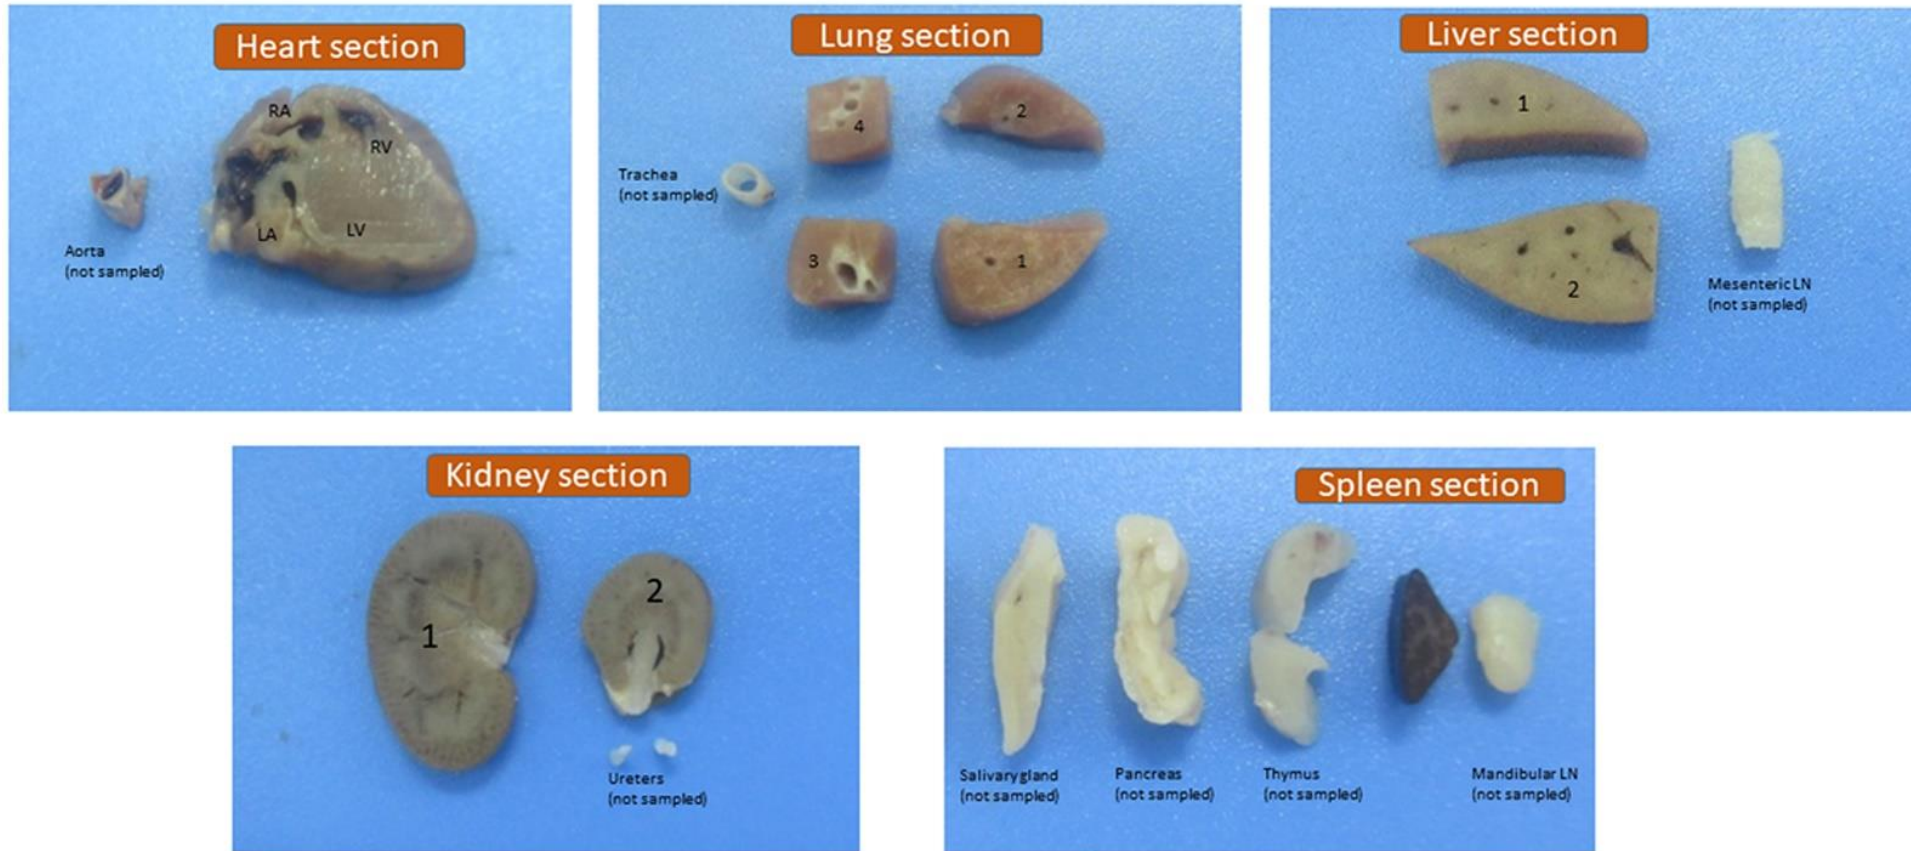

**Figure S1. Histopathology processing of rats' tissues.**

**Note:** (A) rectangles through the tissue denote cross sections. Rectangles with arrows indicate longitudinal sections. (B) Tissues were embedded in the mold as viewed from this perspective. At microtomy, tissues on the slide were “mirrored” when compared to these images.

**Abbreviations:** RA, right atria; LA, left atria; RV, right ventricle; LV, left ventricle; LN, lymph node.

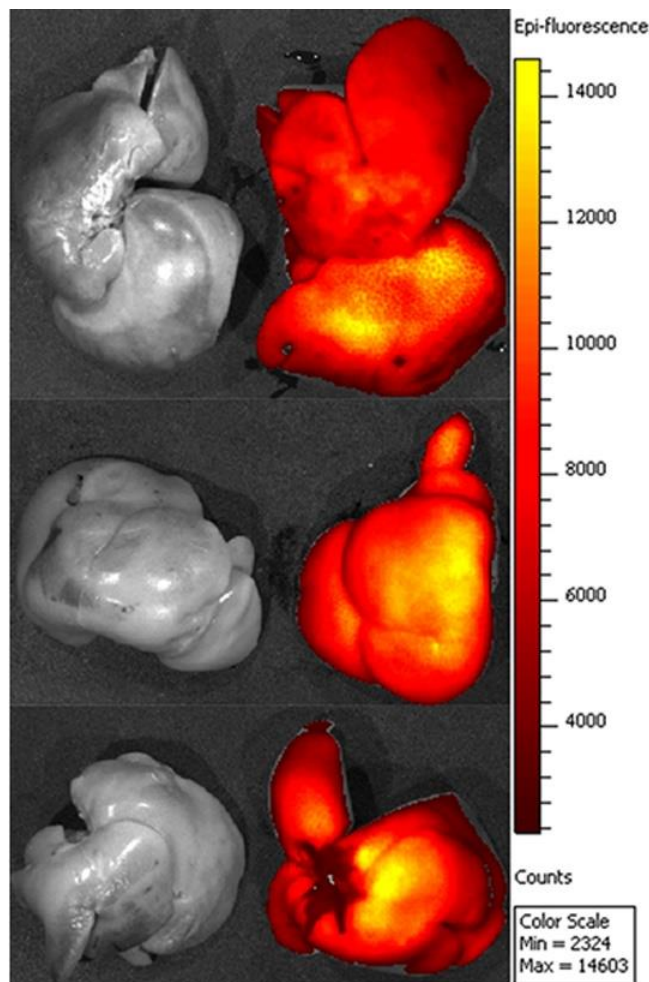

**Liver**

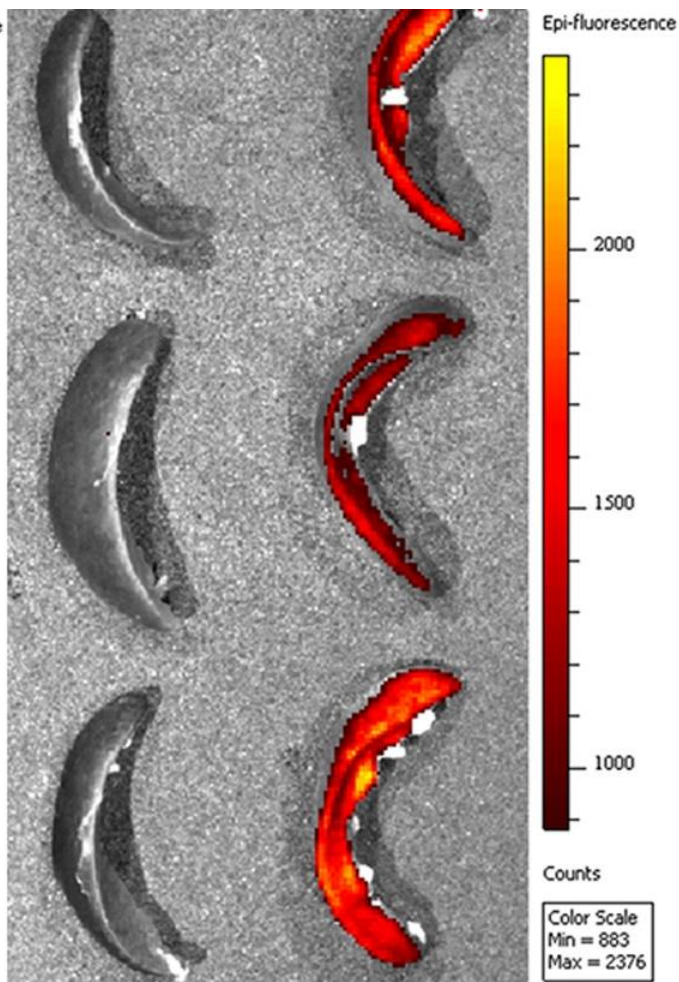

**Spleen**

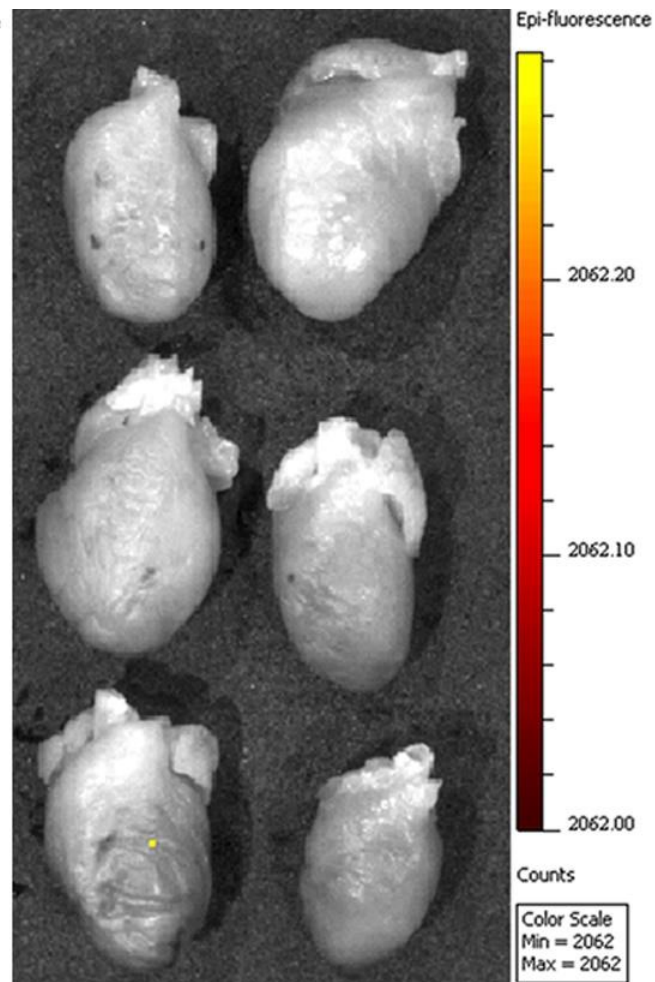

**Heart**

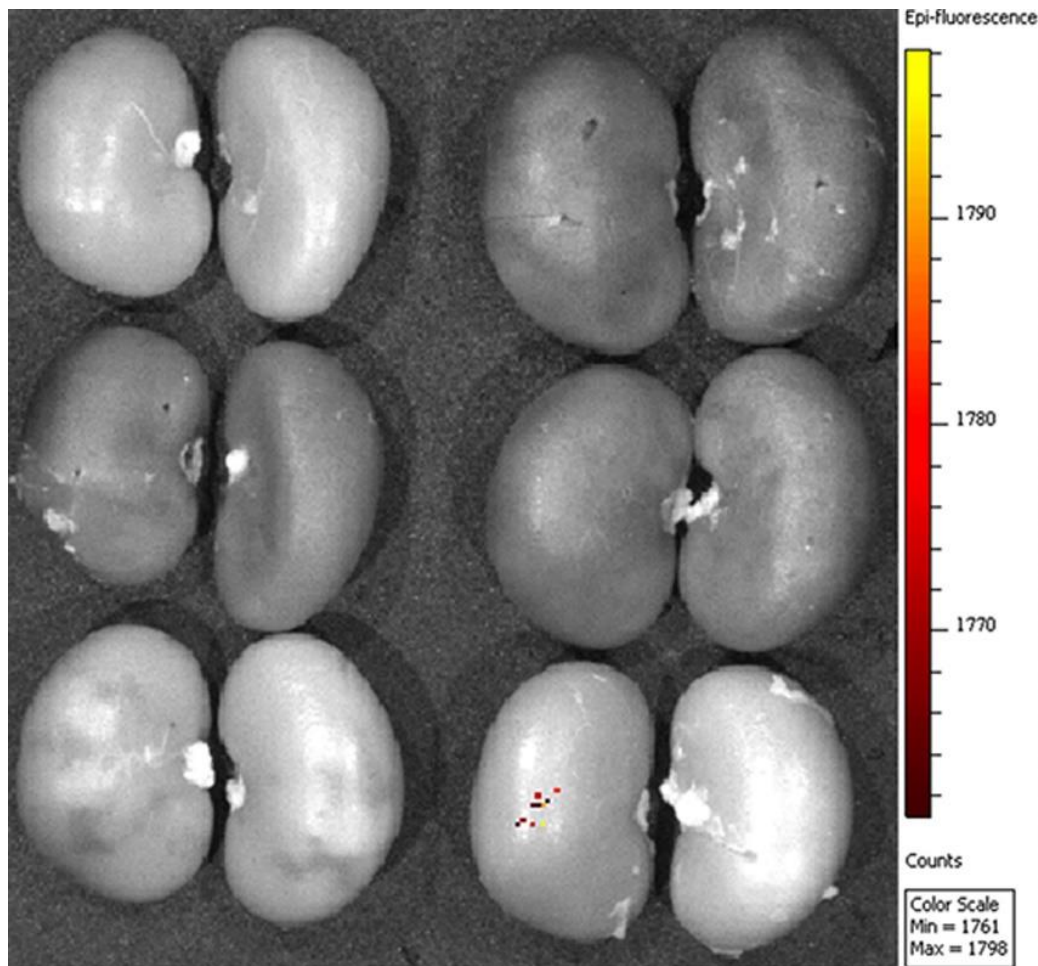

**Kidney**

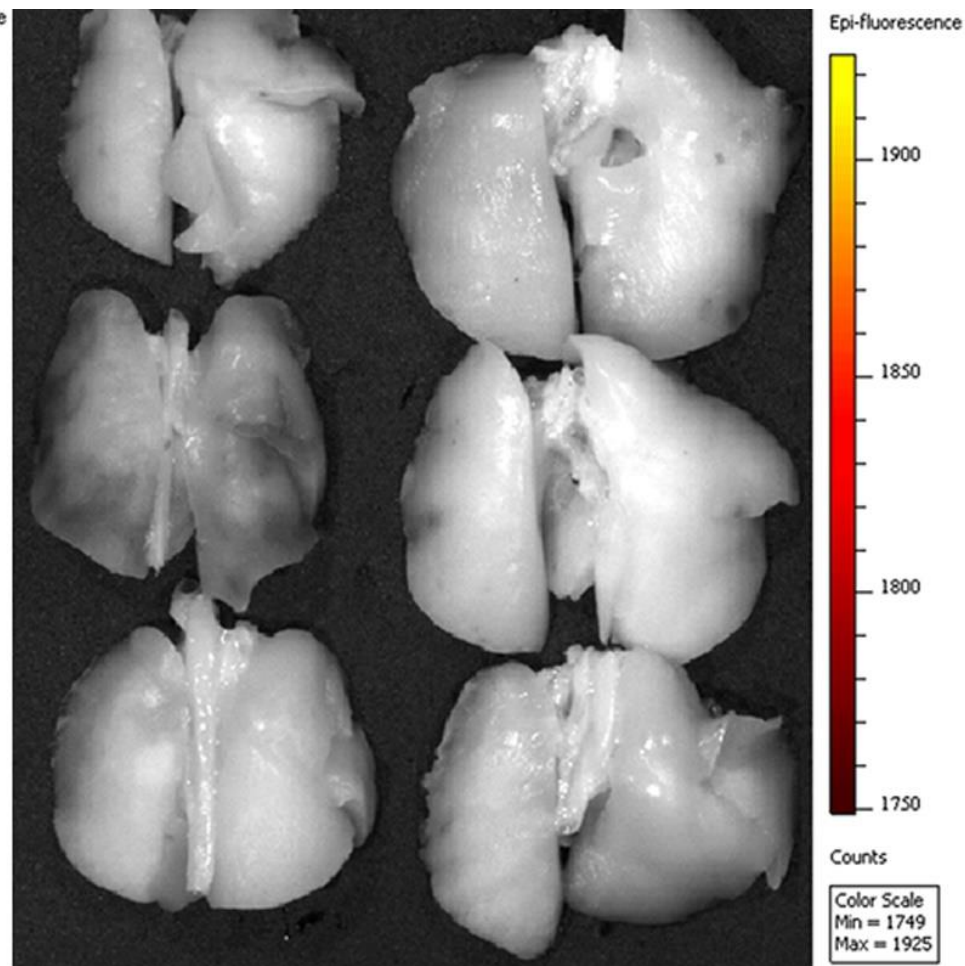

**Lung**

**Figure S2. IVIS images of dissected, isolated intact organs of rats, representing examples of organs.**

**Note:** Organs obtained from three control animals (injected with PBS) are presented on the left column of each image, three FNDP-(NV) treated animals are presented on right column of each image. Intensity of fluorescence is in red (low) to yellow (high) color scale.

**Abbreviations:** FNDP-(NV), fluorescence nanodiamonds particles with NV active centers; IVIS, in vivo imaging system

**A**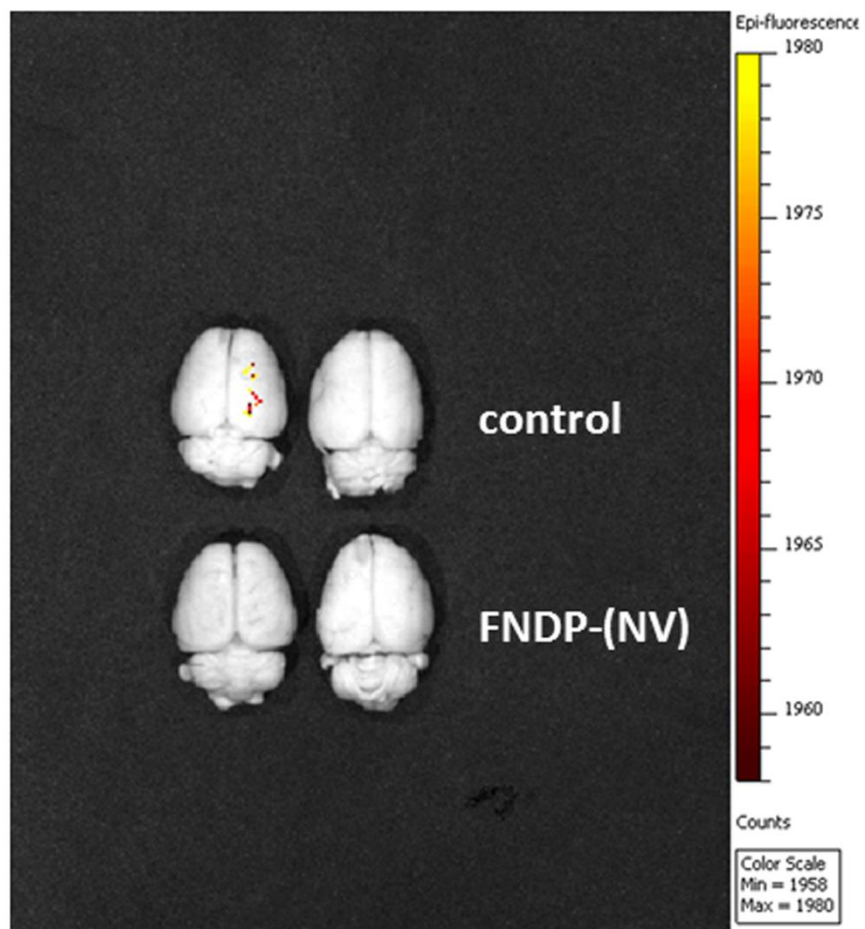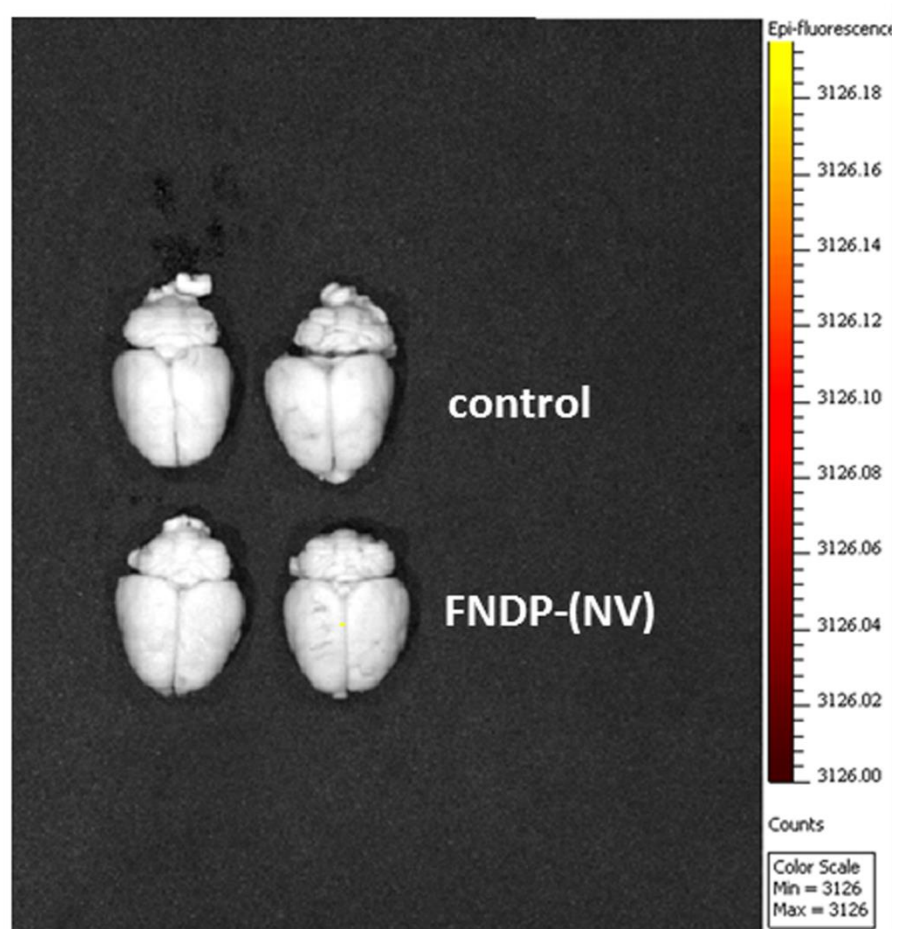

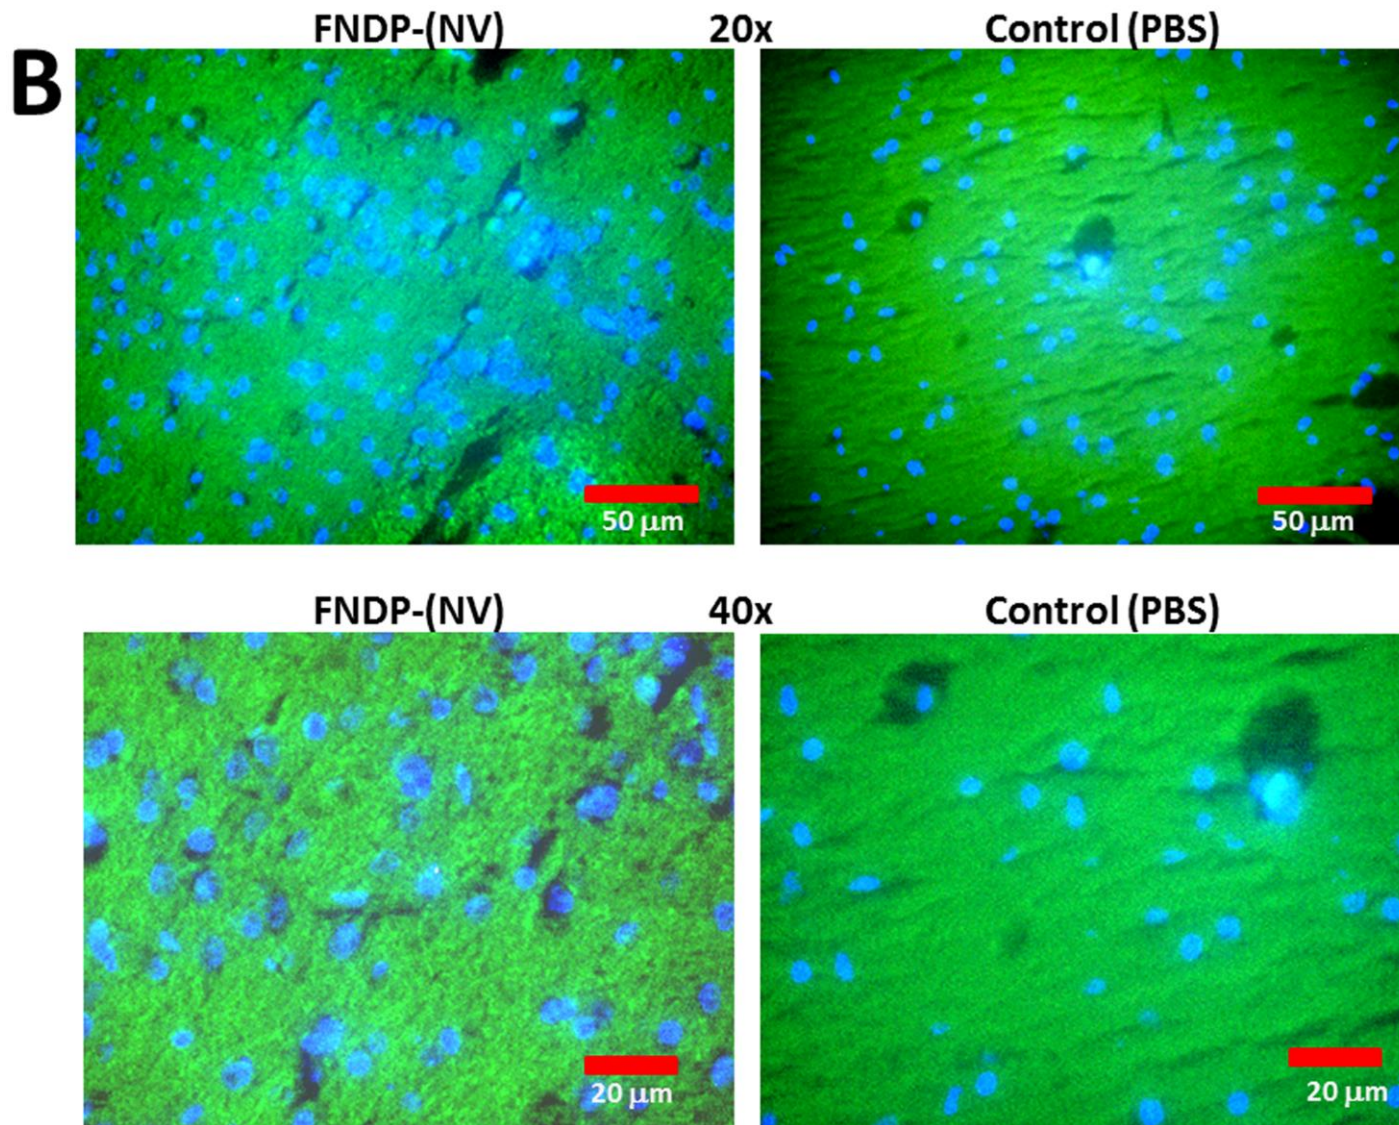

**Figure S3. Detection of FNDP-(NV) in the brain of rats**

**Note:** (A) IVIS images of dissected brains isolated in post-injection day 5 (left panel) and day 14 (right panel). The images of brains from control (PBS) animals are presented in top rows, whereas images of brains of animals treated with FNDP-(NV) are presented on the bottom rows. The intensity of fluorescence is in red (low) to yellow (high) color scale. (B) Fluorescence microscope images of paraffin sections of brains from 14 days study. Tissue slides were stained with FITC phalloidin (green) and DAPI (blue). FNDP-(NV) are expected to be marked by red to yellow speckles in red filter (TRITC). Slides were analyzed using fluorescence microscope (Olympus FSX100) with two objectives (20x and 40x).

**Abbreviations:** FNDP-(NV), fluorescence NanoDiamonds particles with NV active centers; IVIS, in vivo imaging system; DAPI, 4',6-diamidino-2-phenylindole; FITC, fluorescein isothiocyanate; TRITC, tetramethylrhodamine isothiocyanate.

**A**

**Control, Cardiac Muscle Histopathology**

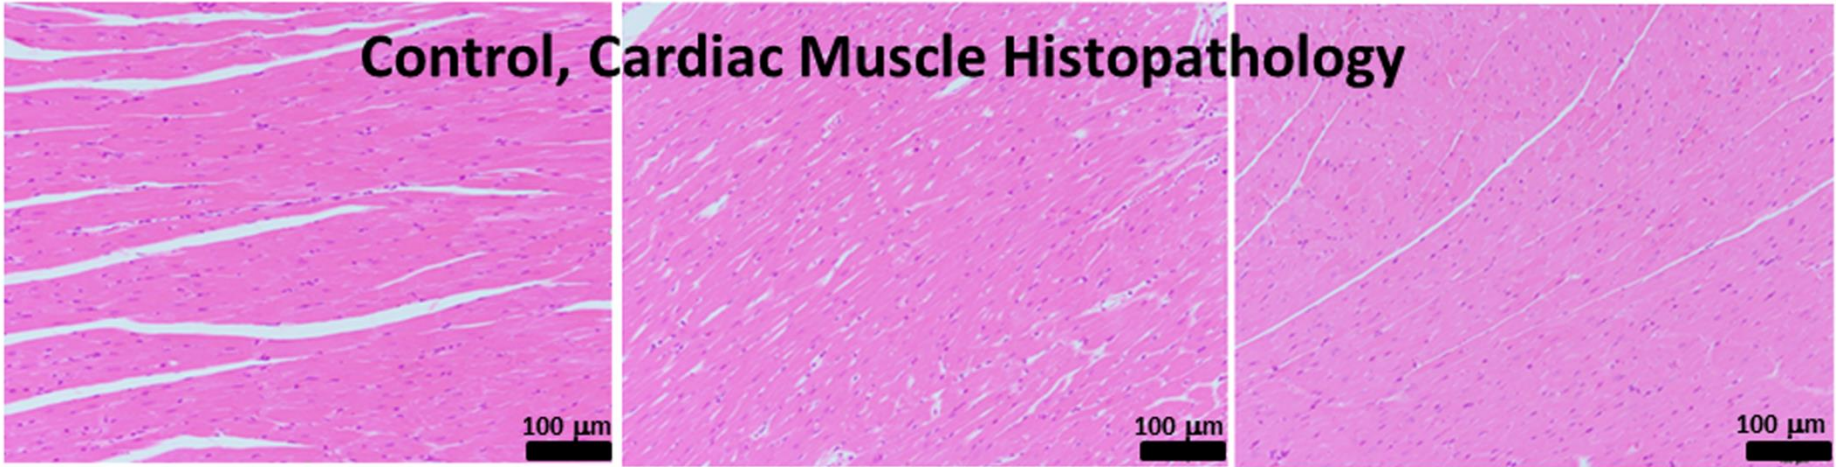

**FNDP-(NV) treated, Cardiac Muscle Histopathology**

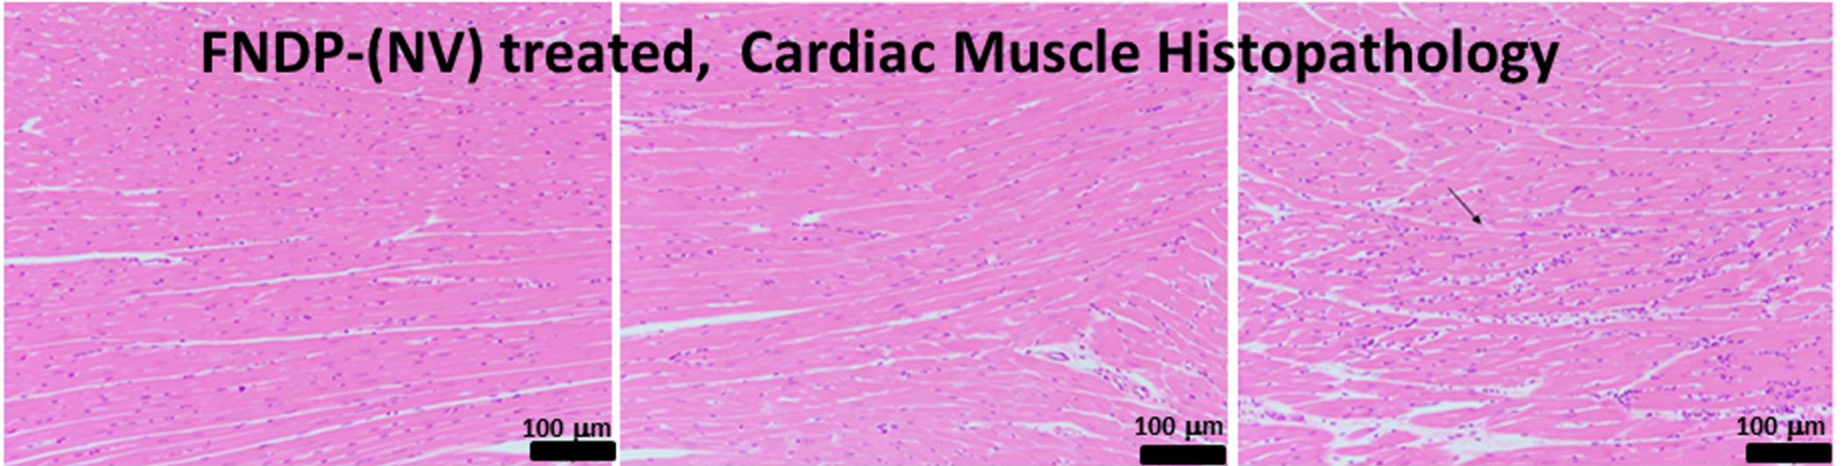

**B****Controls, Lung Histopathology**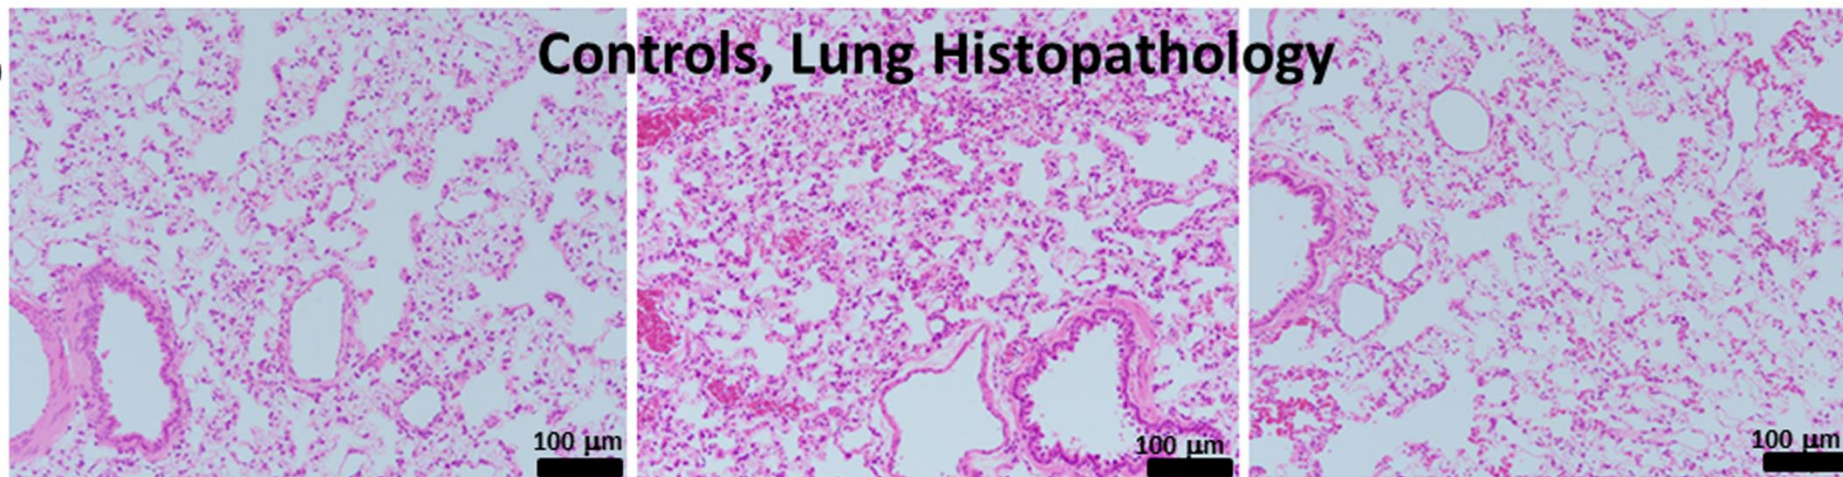**FNDP-(NV) treated, Lung Histopathology**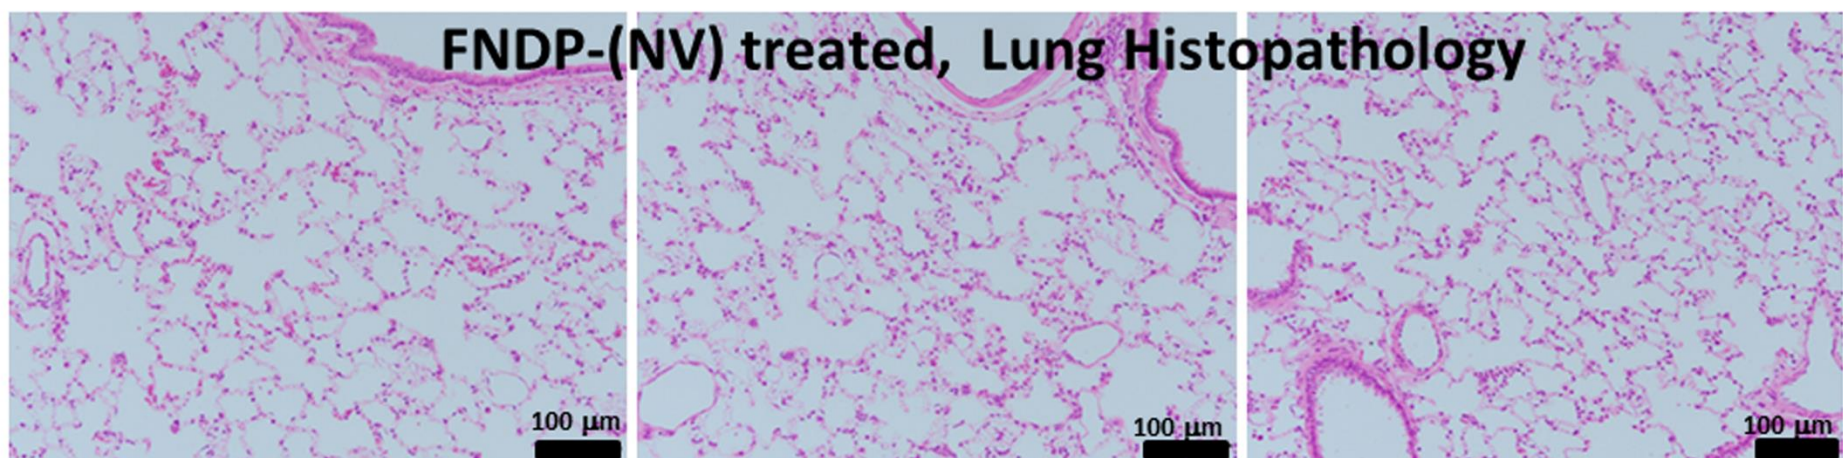



**C**

**Control, Liver Histopathology**

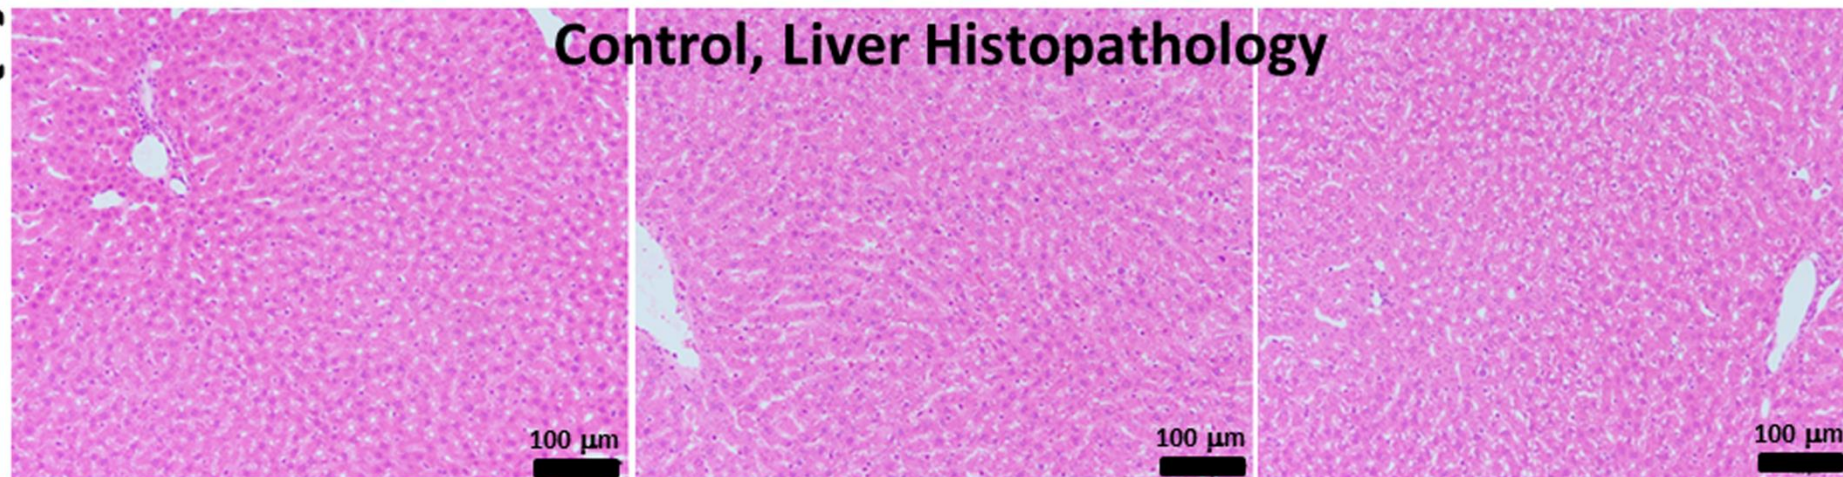

**FNDP-(NV) treated, Liver Histopathology**

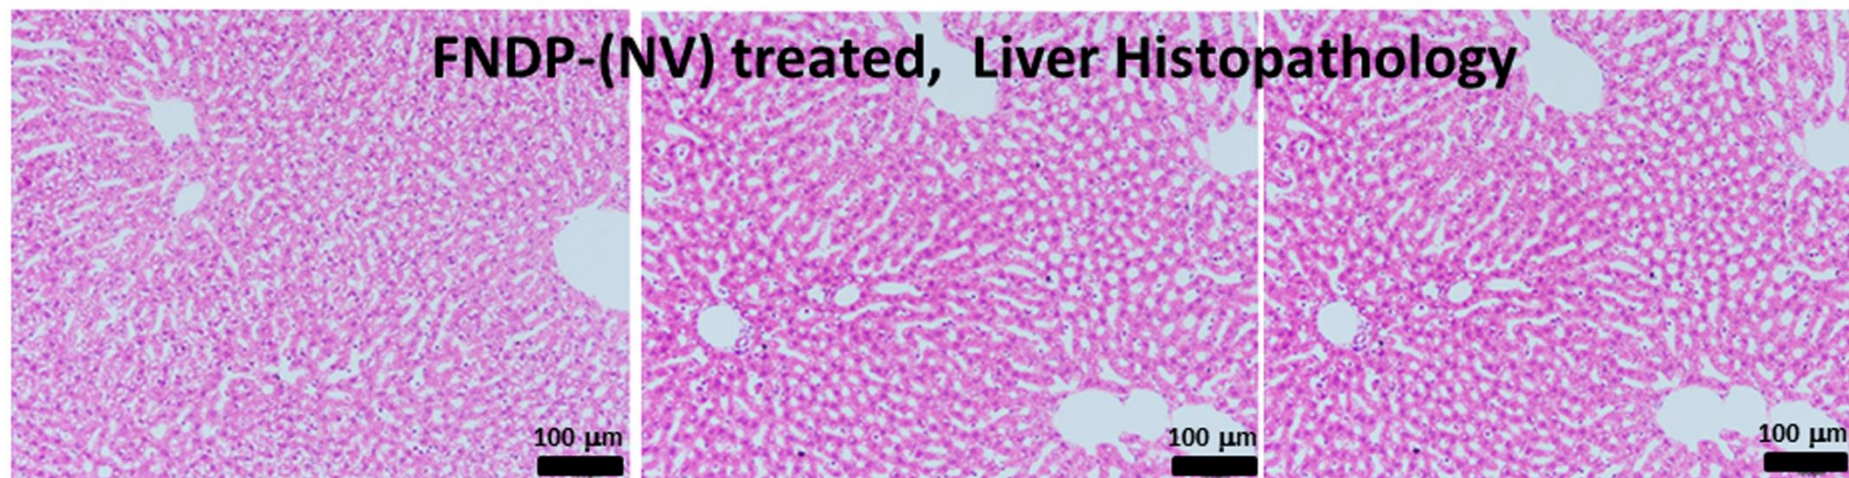

**D**

**Control, Kidney Histopathology**

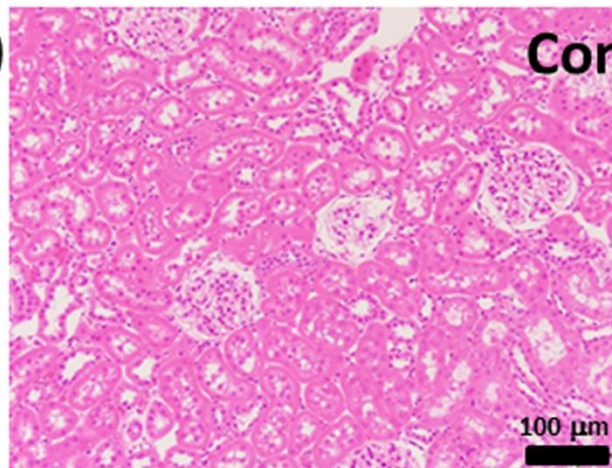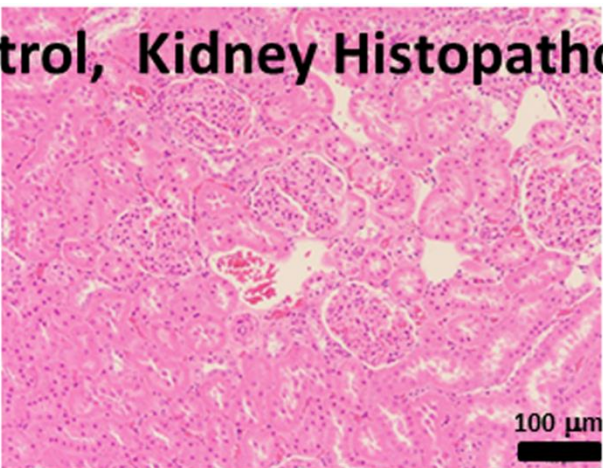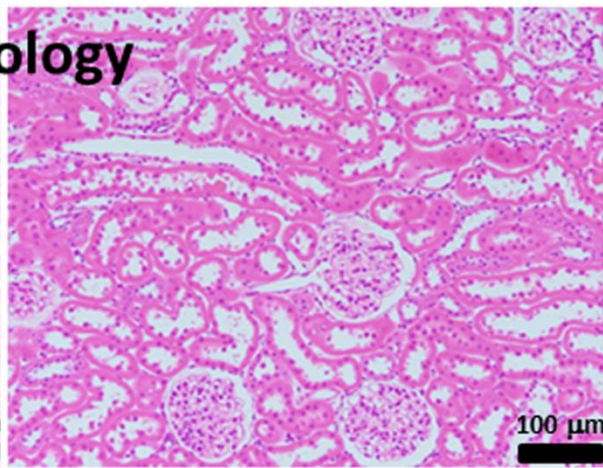

**FNDP-(NV) treated, Kidney Histopathology**

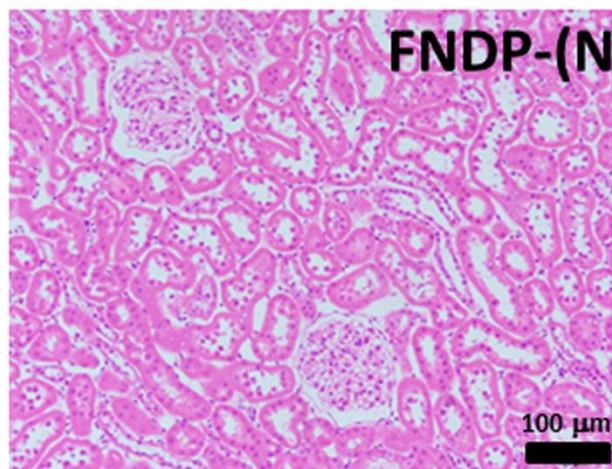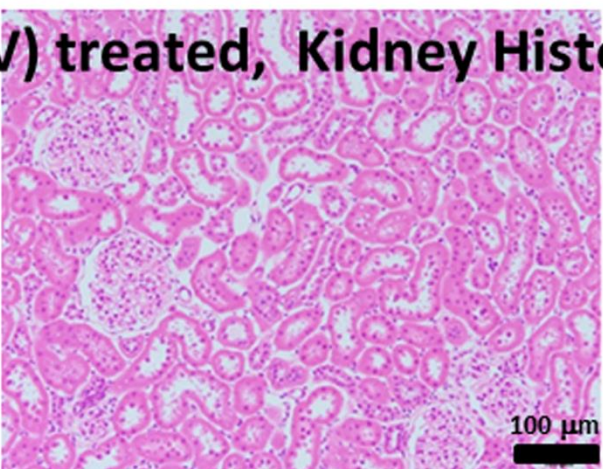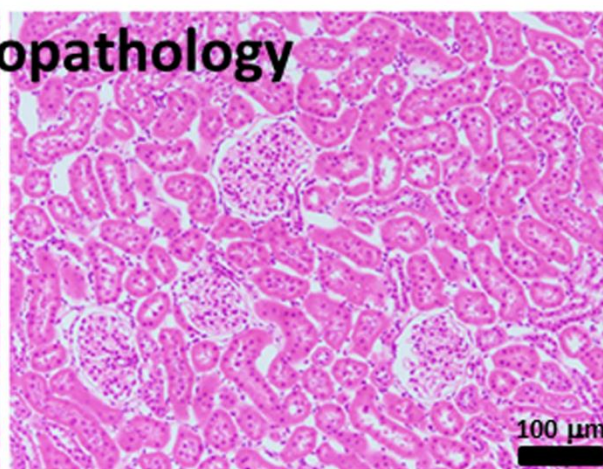

**E** Control, Kidney Medulla Histopathology

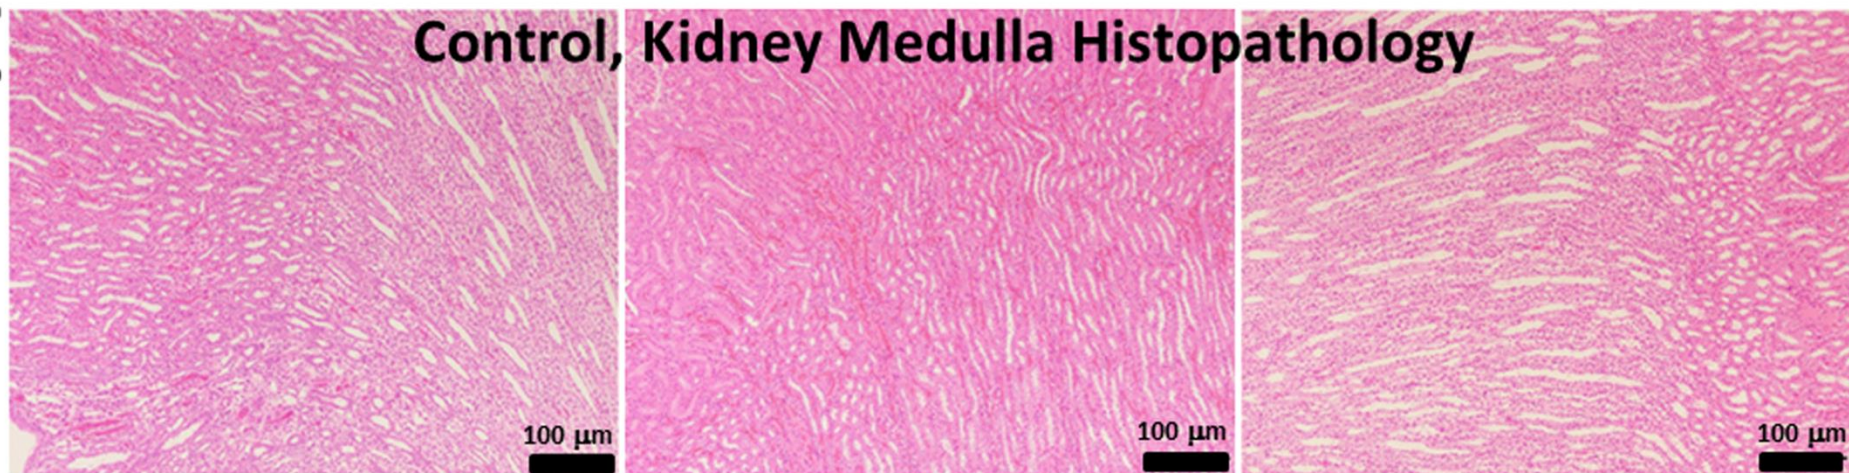

FNDP-(NV) treated, Kidney Medulla Histopathology

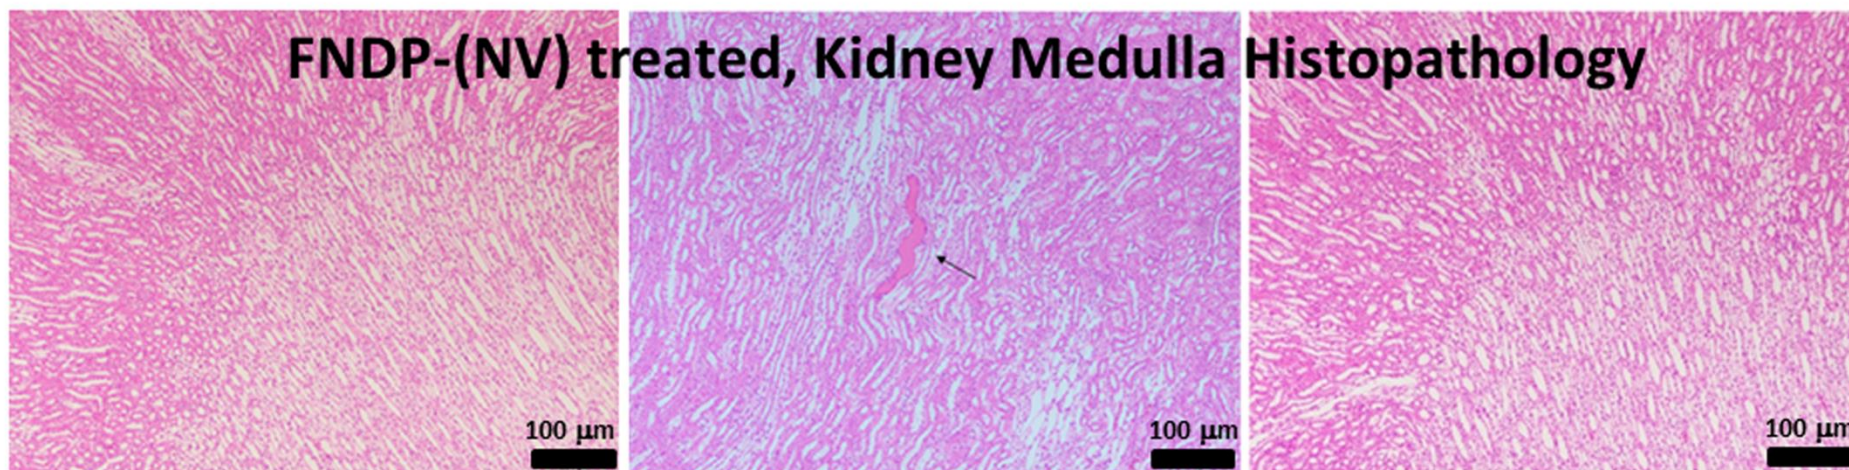

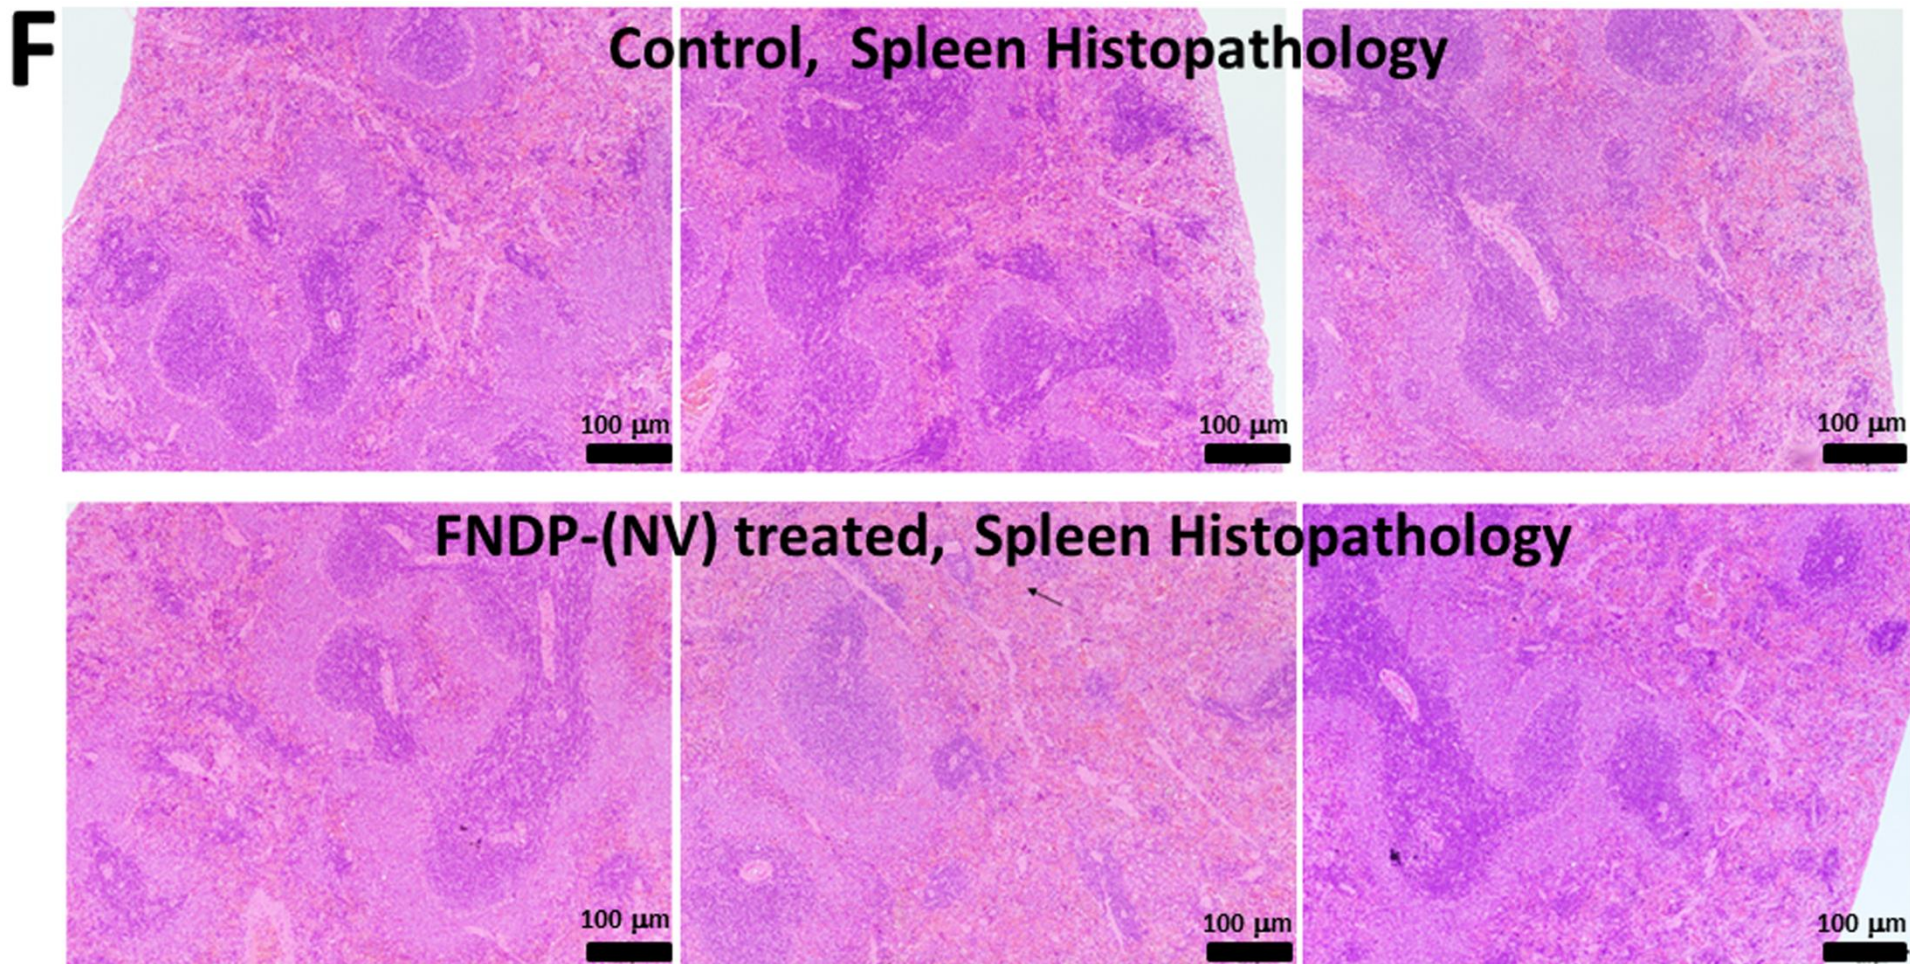

**Figure S4. Images of paraffin embedded tissue sections of the organs dissected from the rats treated or not with FNDP-(NV).**

**Note:** (A) Images of heart tissue obtained from control, vehicle (PBS) treated rats (three top images) and FNDP-(NV)-treated rats (three bottom images). Arrow indicates single mononuclear cell. (B) Images of lung tissue obtained from control, vehicle (PBS) treated rats (two top images) and FNDP-(NV)-treated rats (two bottom images). (C) Images of liver tissue obtained from control, vehicle (PBS) treated rats (two top images) and FNDP-(NV)-treated rats (two bottom images). (D) Images of kidney tissue obtained from control, vehicle (PBS) treated rats (two top images) and FNDP-(NV)-treated rats (two bottom images). (E) Images of kidney medulla tissue obtained from control, vehicle (PBS) treated rats (two top images) and FNDP-(NV)-treated rats (two bottom images). Arrow indicates hyaline deposit in one collecting duct. (F) Images of spleen tissue obtained from control, vehicle (PBS) treated rats (two top images) and FNDP-(NV)-treated rats (two bottom images). Arrow indicates slight pigmentation zone suspected as hemosiderin.

**Abbreviations:** FNDP-(NV), fluorescence nanodiamonds particles with NV active centers

## II. Supplementary Tables

**Table S1. Dataset of blood analysis of rats treated or not with FNDP-(NV).**

**Abbreviation:** All symbols used for description of blood parameters are described in Figure 4 legend.

| Clinical Blood Tests      | FNDP(NV)-Z800 |       |      |      |      |      | Control |      |      |      |      |      |      |       |
|---------------------------|---------------|-------|------|------|------|------|---------|------|------|------|------|------|------|-------|
| Animal #:                 | 1             | 2     | 3    | 4    | 5    | 6    | 1       | 2    | 3    | 4    | 5    | 6    | 7    | 8     |
| <b>Hematology</b>         |               |       |      |      |      |      |         |      |      |      |      |      |      |       |
| WBC (k/ul)                | 9.25          | 12.66 | 7.08 | 6.37 | 5.55 | 6.21 | 2.07    | 5.52 | 2.62 | --   | 5.93 | 5.82 | 5.82 | 15.29 |
| RBC (m/ul)                | 8.32          | 8.15  | 8.17 | 7.72 | 8.02 | 7.72 | 8.05    | 8.46 | 8.23 | --   | 8.24 | 7.53 | 8.22 | 7.56  |
| HGB (g/dl)                | 14.5          | 14.2  | 13.9 | 13.5 | 14.6 | 13.9 | 15.2    | 15.5 | 15.7 | --   | 14.7 | 14.3 | 14.9 | 14.8  |
| HCT (%)                   | 45.5          | 43.1  | 43.2 | 42.2 | 44.3 | 43.5 | 45.7    | 47.2 | 46.3 | --   | 45.2 | 43   | 44.5 | 43.9  |
| MCV (fl)                  | 54.7          | 52.8  | 52.9 | 54.7 | 55.3 | 56.3 | 56.8    | 55.8 | 56.3 | --   | 54.8 | 57.2 | 54.1 | 58.1  |
| MCH (pg)                  | 17.5          | 17.4  | 17   | 17.5 | 18.2 | 18.1 | 18.9    | 18.4 | 19.1 | --   | 17.8 | 18.9 | 18.2 | 19.5  |
| MCHC (g/dL)               | 31.9          | 32.9  | 32.1 | 32   | 32.8 | 32.1 | 33.3    | 33   | 33.9 | --   | 32.5 | 33.1 | 33.6 | 33.6  |
| RDW (%)                   | 13.9          | 13.5  | 12.5 | 13.7 | 12.4 | 13.3 | 11.6    | 12   | 11.6 | --   | 11.9 | 11.7 | 12.1 | 10.9  |
| PLAT (k/UL)               | 1083          | 856   | 949  | 1100 | 776  | 1000 | 874     | 938  | 745  | --   | 1040 | 859  | 912  | 805   |
| MPV (fl)                  | 7.3           | 7.4   | 7.7  | 8    | 7.4  | 7    | 7.4     | 7.5  | 7.8  | --   | 7.6  | 7.4  | 7.6  | 7.1   |
| <b>Coagulation</b>        |               |       |      |      |      |      |         |      |      |      |      |      |      |       |
| APTT(sec)                 | no            | no    | 16.6 | >100 | no   | 17.7 | --      | --   | no   | --   | no   | no   | 16.6 | no    |
| Fibrinogen(mg/dL)         | 156           | 136   | 157  | 144  | 155  | 144  | --      | --   | 165  | --   | 152  | 164  | 163  | 154   |
| Prothrombin Time(sec)     | 10.6          | 11.2  | 11.3 | 11.5 | 11.8 | 12.1 | --      | --   | 10.7 | --   | 10.9 | 10.7 | 11.2 | 11.2  |
| INR                       | 0.9           | 1     | 1    | 1    | 1    | 1    | --      | --   | 0.9  | --   | 0.9  | 0.9  | 1    | 1     |
| <b>General</b>            |               |       |      |      |      |      |         |      |      |      |      |      |      |       |
| Sodium (mmol/l)           | 143           | 141   | 142  | 142  | 144  | 143  | 145     | 141  | 140  | 145  | 141  | 143  | 144  | 142   |
| Potassium (mmol/L)        | 7.2           | 6.7   | 6.2  | 6.1  | 5.9  | 5.2  | 6.2     | 7.4  | 9.5  | 5.7  | 6.8  | 6.3  | 6.7  | 6.1   |
| Chloride (mmol/L)         | 99            | 101   | 101  | 103  | 103  | 103  | 103     | 101  | 100  | 103  | 99   | 101  | 100  | 100   |
| CO2 (mmol/L)              | 24            | 23    | 24   | 24   | 22   | 22   | 23      | 22   | 23   | 19   | 24   | 27   | 26   | 26    |
| Glucose Random (mg/dL)    | 133           | 211   | 164  | 196  | 158  | 158  | 142     | 187  | 124  | 161  | 176  | 176  | 171  | 196   |
| BUN (mg/dL)               | 20            | 18    | 18   | 15   | 18   | 16   | 16      | 15   | 17   | 18   | 14   | 18   | 18   | 19    |
| Creatinine (mg/dl)        | 0.3           | 0.31  | 0.36 | 0.3  | 0.34 | 0.32 | 0.29    | 0.26 | 0.32 | 0.23 | 0.24 | 0.3  | 0.35 | 0.3   |
| Protein Total (g/dL)      | 6.8           | 6.3   | 6.7  | 5.8  | 6.2  | 5.9  | 6       | 6.3  | 7    | 5.9  | 6.1  | 6.3  | 6.4  | 5.6   |
| Albumin (g/dl)            | 3.31          | 3.06  | 3.13 | 2.93 | 2.97 | 2.91 | 3.25    | 3.3  | 3.7  | 3.13 | 3.26 | 3.42 | 3.28 | 3.03  |
| Alkaline Phosphatase(U/L) | 291           | 154   | 212  | 135  | 135  | 150  | 285     | 171  | 185  | 185  | 291  | 187  | 205  | 260   |
| AST (u/L)                 | 109           | 163   | 123  | 105  | 122  | 113  | 135     | 100  | 200  | 201  | 160  | 92   | 89   | 90    |
| ALT (u/L)                 | 42            | 84    | 37   | 51   | 48   | 42   | 41      | 51   | 54   | 47   | 49   | 38   | 48   | 41    |
| Calcium (mg/dL)           | 10.3          | 10.2  | 10.2 | 9.6  | 9.9  | 9.8  | 10      | 9.9  | 10   | 9.9  | 9.8  | 10.2 | 10.2 | 9.9   |
| Total Bilirubin (mg/dl)   | 0.2           | 0.1   | 0.1  | 0.2  | 0.2  | 0.1  | 0.2     | 0.3  | 0.6  | 0.2  | 0.2  | 0.1  | 0.1  | 0.1   |

**Table S2. Active place avoidance (APA) test results for each individual animal.**

**Abbreviations:** FNDP, fluorescence nanodiamonds particles; Dist, distance; m, meters; s, seconds; #, number.

|               | Animal | Run#                      | Week 4 |       |       |       |       |       |       | Week 8 |       |       |       |       |       |       | Week 12 |       |       |       |       |       |       |
|---------------|--------|---------------------------|--------|-------|-------|-------|-------|-------|-------|--------|-------|-------|-------|-------|-------|-------|---------|-------|-------|-------|-------|-------|-------|
|               |        |                           | 1      | 2     | 3     | 4     | 5     | 6     | 7     | 1      | 2     | 3     | 4     | 5     | 6     | 7     | 1       | 2     | 3     | 4     | 5     | 6     | 7     |
| FNDP(NV)-2800 | 1      | Dist (m)                  | 31.07  | 26.41 | 32.78 | 31.42 | 22.42 | 29.16 | 28.32 | 26.22  | 28.82 | 30.06 | 33.2  | 31.17 | 33.22 | 33.84 | 28.9    | 30.33 | 24.47 | 30.63 | 41.63 | 32.63 | 32.63 |
|               |        | Shock (#)                 | 34     | 38    | 30    | 43    | 43    | 39    | 31    | 44     | 31    | 18    | 16    | 9     | 7     | 8     | 49      | 30    | 35    | 33    | 13    | 14    | 14    |
|               |        | Entrance (#)              | 16     | 22    | 19    | 10    | 22    | 17    | 11    | 8      | 9     | 11    | 12    | 9     | 7     | 8     | 10      | 10    | 8     | 10    | 13    | 12    | 12    |
|               |        | 1 <sup>st</sup> Entry (s) | 31     | 15    | 20    | 48    | 39    | 23    | 36    | 24     | 29    | 11    | 30    | 31    | 17    | 31    | 23      | 9     | 9     | 47    | 6     | 43    | 14    |
|               | 2      | Dist (m)                  | 34.36  | 32.33 | 40.05 | 39.87 | 43.44 | 44.98 | 43.76 | 33.86  | 40.49 | 36.4  | 35.76 | 39.73 | 39.09 | 24.81 | 44.31   | 39.84 | 39.69 | 38.61 | 37.7  | 37.34 | 37.34 |
|               |        | Shock (#)                 | 27     | 12    | 7     | 2     | 2     | 0     | 2     | 13     | 6     | 0     | 0     | 1     | 0     | 1     | 3       | 0     | 0     | 0     | 0     | 0     | 1     |
|               |        | Entrance (#)              | 8      | 4     | 6     | 2     | 2     | 0     | 1     | 3      | 1     | 0     | 0     | 1     | 0     | 1     | 3       | 0     | 0     | 0     | 0     | 0     | 1     |
|               |        | 1 <sup>st</sup> Entry (s) | 44     | 20    | 92    | 109   | 41    | 600   | 319   | 1      | 234   | 600   | 600   | 36    | 600   | 38    | 43      | 600   | 600   | 600   | 600   | 600   | 285   |
|               | 3      | Dist (m)                  | 46.05  | 41.33 | 40.38 | 41.98 | 32.09 | 40.38 | 40.78 | 46.39  | 38.96 | 39.24 | 38.35 | 36.28 | 37.42 | 37.88 | 46.68   | 41.3  | 36.36 | 32.4  | 33.88 | 37.48 | 37.48 |
|               |        | Shock (#)                 | 13     | 1     | 0     | 1     | 0     | 0     | 1     | 7      | 0     | 0     | 3     | 0     | 0     | 2     | 3       | 1     | 1     | 1     | 1     | 0     | 0     |
|               |        | Entrance (#)              | 12     | 1     | 0     | 1     | 0     | 0     | 1     | 3      | 0     | 0     | 2     | 0     | 0     | 2     | 3       | 1     | 1     | 1     | 1     | 0     | 0     |
|               |        | 1 <sup>st</sup> Entry (s) | 29     | 33    | 600   | 9     | 600   | 600   | 108   | 137    | 600   | 600   | 397   | 600   | 600   | 507   | 7       | 430   | 380   | 27    | 101   | 600   | 600   |
|               | 4      | Dist (m)                  | 48.32  | 48.02 | 39.04 | 39.18 | 37.01 | 38.06 | 34.19 | 49.14  | 34.32 | 30.99 | 26.61 | 30.74 | 30.36 | 30.02 | 44.37   | 44.73 | 44.62 | 43.88 | 41.88 | 31.61 | 36.44 |
|               |        | Shock (#)                 | 31     | 11    | 3     | 17    | 7     | 2     | 4     | 33     | 28    | 1     | 19    | 3     | 0     | 3     | 29      | 14    | 15    | 21    | 16    | 9     | 3     |
|               |        | Entrance (#)              | 16     | 11    | 3     | 12    | 7     | 2     | 4     | 18     | 8     | 1     | 9     | 3     | 0     | 3     | 20      | 14    | 14    | 18    | 14    | 7     | 4     |
|               |        | 1 <sup>st</sup> Entry (s) | 26     | 34    | 26    | 31    | 22    | 246   | 71    | 8      | 64    | 33    | 32    | 39    | 600   | 296   | 35      | 66    | 39    | 41    | 28    | 4     | 93    |
|               | 5      | Dist (m)                  | 33.37  | 31.88 | 37.84 | 33.4  | 36.61 | 37    | 37    | 45.32  | 37.12 | 34.44 | 33.78 | 33.82 | 33.78 | 33.82 | 46.85   | 43.65 | 37.78 | 35.71 | 36.31 | 35.19 | 35.19 |
|               |        | Shock (#)                 | 36     | 46    | 1     | 1     | 0     | 0     | 0     | 23     | 8     | 0     | 0     | 0     | 0     | 0     | 19      | 21    | 12    | 1     | 2     | 0     | 0     |
|               |        | Entrance (#)              | 12     | 16    | 1     | 1     | 0     | 0     | 0     | 14     | 3     | 0     | 0     | 0     | 0     | 0     | 18      | 14    | 9     | 1     | 2     | 0     | 0     |
|               |        | 1 <sup>st</sup> Entry (s) | 3      | 22    | 317   | 232   | 600   | 600   | 600   | 32     | 119   | 600   | 600   | 600   | 600   | 600   | 20      | 37    | 343   | 21    | 31    | 600   | 600   |
|               | 6      | Dist (m)                  | 34.07  | 37.89 | 49.8  | 49.33 | 41.27 | 41.69 | 37.07 | 23.38  | 38.27 | 46.04 | 38.38 | 37.66 | 40.76 | 42.39 | 43.85   | 42.44 | 42.49 | 41.23 | 43.22 | 40.71 | 27.09 |
|               |        | Shock (#)                 | 44     | 35    | 17    | 13    | 3     | 2     | 3     | 38     | 33    | 19    | 7     | 8     | 9     | 9     | 19      | 16    | 13    | 12    | 3     | 10    | 3     |
|               |        | Entrance (#)              | 14     | 17    | 17    | 13    | 4     | 1     | 2     | 10     | 14    | 13    | 7     | 8     | 9     | 9     | 11      | 16    | 14    | 12    | 3     | 9     | 2     |
|               |        | 1 <sup>st</sup> Entry (s) | 22     | 17    | 10    | 33    | 159   | 283   | 28    | 27     | 4     | 30    | 202   | 37    | 61    | 81    | 39      | 6     | 36    | 39    | 330   | 107   | 291   |
| Control       | 1      | Dist (m)                  | 39.88  | 61.63 | 34.68 | 42.14 | 33.14 | 34.39 | 34.36 | 44.32  | 41.32 | 37.26 | 43.06 | 43.73 | 43.39 | 41.89 |         |       |       |       |       |       |       |
|               |        | Shock (#)                 | 28     | 21    | 18    | 3     | 0     | 0     | 0     | 14     | 8     | 1     | 2     | 2     | 0     | 0     |         |       |       |       |       |       |       |
|               |        | Entrance (#)              | 17     | 18    | 17    | 3     | 0     | 0     | 0     | 13     | 8     | 1     | 2     | 2     | 0     | 0     |         |       |       |       |       |       |       |
|               |        | 1 <sup>st</sup> Entry (s) | 102    | 12    | 20    | 22    | 600   | 600   | 600   | 1      | 26    | 231   | 21    | 219   | 600   | 600   |         |       |       |       |       |       |       |
|               | 2      | Dist (m)                  | 63.83  | 48.2  | 43.06 | 39.98 | 39.1  | 37.38 | 39.12 | 44.07  | 49.81 | 40.97 | 39.98 | 41.06 | 40.79 | 40.29 |         |       |       |       |       |       |       |
|               |        | Shock (#)                 | 38     | 28    | 1     | 1     | 0     | 0     | 1     | 9      | 27    | 3     | 1     | 2     | 1     | 0     |         |       |       |       |       |       |       |
|               |        | Entrance (#)              | 19     | 11    | 1     | 1     | 0     | 0     | 1     | 4      | 8     | 2     | 1     | 1     | 1     | 0     |         |       |       |       |       |       |       |
|               |        | 1 <sup>st</sup> Entry (s) | 7      | 23    | 349   | 179   | 600   | 600   | 21    | 3      | 46    | 23    | 327   | 339   | 416   | 600   |         |       |       |       |       |       |       |
|               | 3      | Dist (m)                  | 30.3   | 37.29 | 49.47 | 40.03 | 39.67 | 43.73 | 40.03 | 49.05  | 33.91 | 30    | 48.68 | 42.06 | 41.95 | 41.09 |         |       |       |       |       |       |       |
|               |        | Shock (#)                 | 24     | 27    | 23    | 3     | 3     | 3     | 1     | 30     | 11    | 22    | 6     | 0     | 0     | 1     |         |       |       |       |       |       |       |
|               |        | Entrance (#)              | 16     | 23    | 18    | 1     | 2     | 3     | 1     | 13     | 3     | 9     | 3     | 0     | 0     | 1     |         |       |       |       |       |       |       |
|               |        | 1 <sup>st</sup> Entry (s) | 3      | 21    | 32    | 4     | 10    | 16    | 333   | 28     | 97    | 18    | 11    | 600   | 600   | 241   |         |       |       |       |       |       |       |
|               | 4      | Dist (m)                  | 37.84  | 40.05 | 37.29 | 33.32 | 36.81 | 34.94 | 34.42 | 42.76  | 38.76 | 39.34 | 38.01 | 33.91 | 38.01 | 33.91 |         |       |       |       |       |       |       |
|               |        | Shock (#)                 | 12     | 4     | 2     | 0     | 0     | 1     | 1     | 7      | 1     | 0     | 0     | 0     | 0     | 0     |         |       |       |       |       |       |       |
|               |        | Entrance (#)              | 6      | 4     | 2     | 0     | 0     | 1     | 1     | 6      | 1     | 0     | 0     | 0     | 0     | 0     |         |       |       |       |       |       |       |
|               |        | 1 <sup>st</sup> Entry (s) | 23     | 90    | 69    | 600   | 600   | 164   | 16    | 4      | 363   | 600   | 600   | 600   | 600   | 600   |         |       |       |       |       |       |       |
|               | 5      | Dist (m)                  | 63.87  | 69.13 | 36.93 | 38.32 | 66.19 | 61.36 | 37.88 | 69.12  | 60.43 | 62.09 | 31.17 | 49.93 | 48.74 | 48.33 |         |       |       |       |       |       |       |
|               |        | Shock (#)                 | 34     | 28    | 29    | 33    | 27    | 28    | 24    | 26     | 18    | 14    | 16    | 4     | 11    | 4     |         |       |       |       |       |       |       |
|               |        | Entrance (#)              | 20     | 22    | 21    | 20    | 23    | 22    | 17    | 22     | 17    | 14    | 16    | 4     | 11    | 4     |         |       |       |       |       |       |       |
|               |        | 1 <sup>st</sup> Entry (s) | 10     | 23    | 63    | 46    | 7     | 33    | 4     | 6      | 19    | 8     | 10    | 33    | 28    | 63    |         |       |       |       |       |       |       |

# III. Supplementary Reports

## Histopathology report

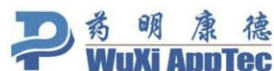

### DRAFT PATHOLOGY REPORT

### HISTOPATHOLOGY EVALUATION OF THE RAT ORGANS

**STUDY NO.**  
**608-0001-PT**

**TESTING FACILITY**  
WUXI APPTEC (SUZHOU) CO., LTD.  
1318 WUZHONG AVENUE, WUZHONG DISTRICT  
SUZHOU 215104, CHINA

**SPONSOR**  
DEBINA DIAGNOSTICS INC  
NEWTOWN SQUARE, PA 19073

**REPORT DATE**  
**2018-MM-DD**

## 1 INTRODUCTION

The purpose of this study was to conduct histopathological evaluation of livers, spleens, kidneys, lungs and hearts obtained from rats that were treated with nanoparticles or PBS (vehicle).

A total of 6 rats (30 organs total) were examined (three treated and three controls rats).

## 2 REGULATORY COMPLIANCE

The pathology evaluation was not conducted in compliance with international Good Laboratory Practice (GLP) regulations. However, it was conducted in accordance with the study protocol, protocol amendment and Test Facility Standard Operating Procedures (SOPs).

## 3 MATERIALS AND METHODS

Six male rats were assigned to 2 groups of 3 rats each. The study design is summarized in the Text Table 1.

Text Table 1 Study Design

| Group | Single Dose        |                |               | Numbering of Animals |
|-------|--------------------|----------------|---------------|----------------------|
|       | Daily Dose (mg/kg) | Volume (mL/kg) | Conc. (mg/mL) | Male                 |
| 1     | PBS                | 2 mL           | NA            | 1, 2, 3              |
| 2     | 60 mg/kg           | 2mL            | NA            | 1, 2, 3              |

When the in-life phase of the study was completed, animals were necropsied and the organs were collected after whole body-perfusion with 10% NBF. The wet tissues were shipped to WuXi (Suzhou), processed, sectioned, stained with hematoxylin and eosin, and examined microscopically. One section per slide was prepared and evaluated for each organ (livers, spleens, kidneys, lungs and hearts) as per test facility SOP.

## 4 HISTOPATHOLOGY RESULTS

There were no noteworthy findings in the organs evaluated. The findings observed were non-specific common background changes in rats of this age and strain and not considered to be test article (treatment)-related. Mononuclear cell infiltrates in the heart of young rats are common incidental findings and most likely related to the early stages of rodent progressive cardiomyopathy which is more common in males than females (1). Another common aging change in rats is chronic progressive nephropathy, which in young rats may begin with minor histopathologic changes in the kidneys (2). Hemosiderin deposition in the spleen of rats is a common finding related to the normal turnover of erythrocytes in the spleen.

Detailed individual histopathology findings were presented in Text Table 2.

Text Table 2 Individual Histopathology Data

| Group<br>Dosage<br>Animal No.        | PBS |   |   | Nanoparticle<br>60 mg/kg |    |    |
|--------------------------------------|-----|---|---|--------------------------|----|----|
|                                      | 1   | 2 | 3 | 1                        | 2  | 3  |
| Heart                                | -   | - | - | -                        | -  | -  |
| Mononuclear cell infiltration, focal |     |   |   |                          |    | 1+ |
| Liver                                | -   | - | - | -                        | -  | -  |
| Spleen                               |     |   |   |                          |    |    |
| Pigmentation (resemble hemosiderin)  | -   | - | - | -                        | 1+ | -  |
| Lung                                 | -   | - | - | -                        | -  | -  |
| kidney                               | -   | - | - | -                        | -  | -  |
| Cast, hyaline, focal                 |     |   |   |                          | 1+ |    |

Note: -, Not remarkable; 1+, minimal; 2+, mild; 3+, moderate; 4+, marked; 5+, severe;

## 1 CONCLUSION

There were no pathologically significant findings in the organs evaluated. The findings observed were non-specific common background changes in rats of this age and strain and not considered to be treatment-related.

## REFERENCES

- 1 Spontaneous Cardiomyopathy in Young Sprague-Dawley Rats: Evaluation of Biological and Environmental Variability: *Franck Chanut, Carie Kimbrough, Rick Hailey, et al. Toxicologic Pathology Vol 41, Issue 8, pp. 1126 - 1136 , 2013*
- 2 Chronic Progressive Nephropathy in Aging Rats: *Stephen W. Barthold, D.V.M., Ph.D. Toxicologic Pathology ,Vol 7, Issue 1, pp. 1 – 6, First Published January 1, 1979*
